# Supplementary material for: Lipid biomarkers in aeolian sediments under desert pavements – potential and first results from the Black Rock Desert, Utah, USA, and Fuerteventura, Canary Islands, Spain
Source: Copernicus journal article supplement (doi:10.5194/egqsj-66-103-2018), 2018-01-03
Supplement: Supplementary file 1 [file egqsj-66-103-2018-supplement.zip]

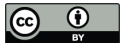

*Supplement of*

**Lipid biomarkers in aeolian sediments under desert pavements  
– potential and first results from the Black Rock Desert, Utah,  
USA, and Fuerteventura, Canary Islands, Spain**

**Marcel Lerch et al.**

*Correspondence to:* Marcel Lerch ([marcel.lerch@mailbox.tu-dresden.de](mailto:marcel.lerch@mailbox.tu-dresden.de))

- [egqsj-66-103-2018-supplement-title-page.pdf](#)
- [Lerch et al. Supplementary material.xlsx](#)

The copyright of individual parts of the supplement might differ from the CC BY 4.0 License.
